# Supplementary material for: Multicellular spheroids containing synthetic mineral particles: an advanced 3D tumor model system to investigate breast precancer malignancy potential according to the mineral type
Source: Royal Society of Chemistry journal article supplement (doi:10.1039/d3tb00439b), 2023-01-01
Supplement: d3tb00439b1.pdf [file d3tb00439b1.pdf]

**Supporting Information for:**

**Multicellular spheroids containing synthetic mineral particles: an advanced 3D tumor model system to investigate breast precancer malignancy potential according to the mineral type**

Amit Cohen<sup>1</sup>, Lotem Gotnayer<sup>1</sup>, Sahar Gal<sup>1</sup>, Dina Aranovich<sup>1</sup>, Netta Vidavsky<sup>1,2</sup>

<sup>1</sup> Department of Chemical Engineering, Ben-Gurion University of the Negev, Beer Sheva

<sup>2</sup> Ilse Katz Institute for Nanoscale Science & Technology, Ben-Gurion University of the Negev, Beer Sheva

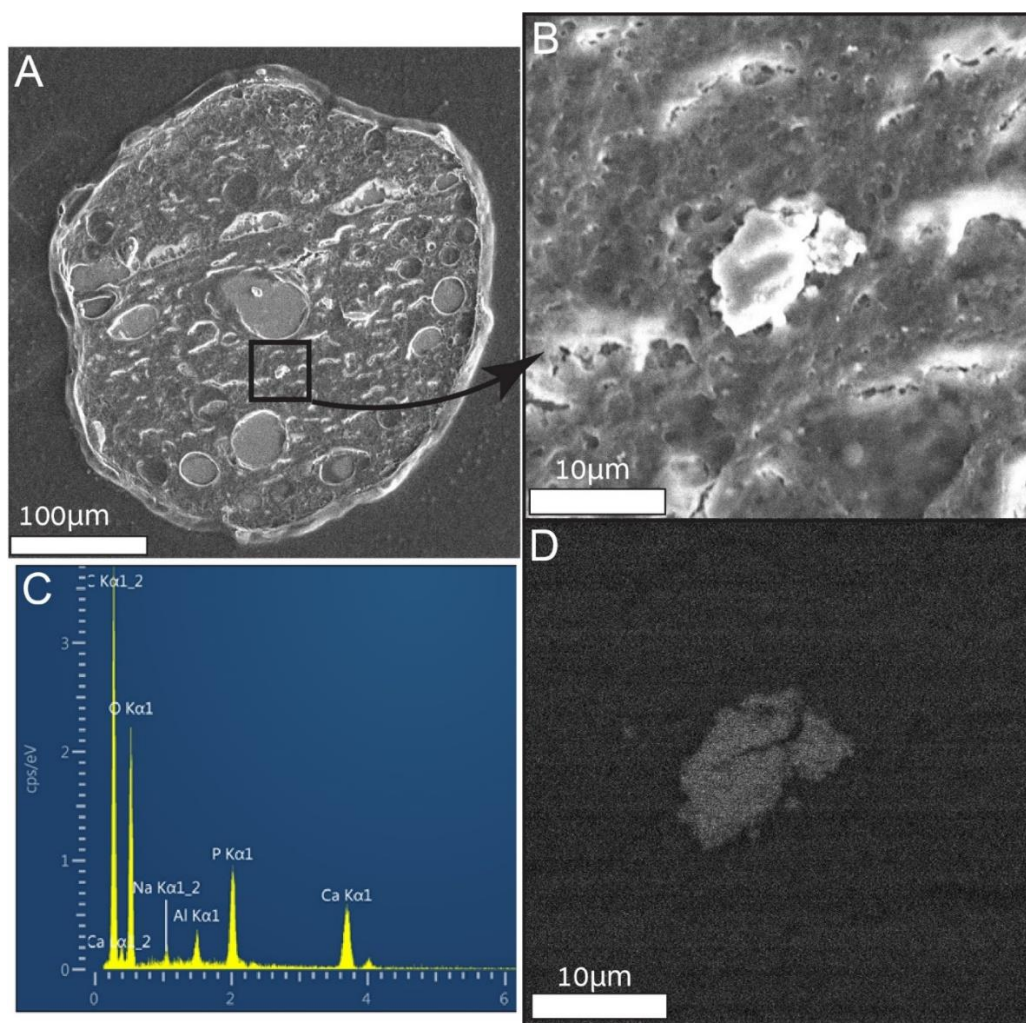

**Figure S1.** **A.** An SEM image of a DCIS spheroid section showing embedded MC analogs. **B.** Magnification of an MC analog in the spheroid section. **C.** EDS analysis showing Ca and P atoms, indicating that the MC consists of calcium phosphate. **D.** Back-scattered electron image of the MC demonstrating how the mineral particles, which appear as bright particles compared to their surrounding organic material, are located during SEM imaging.

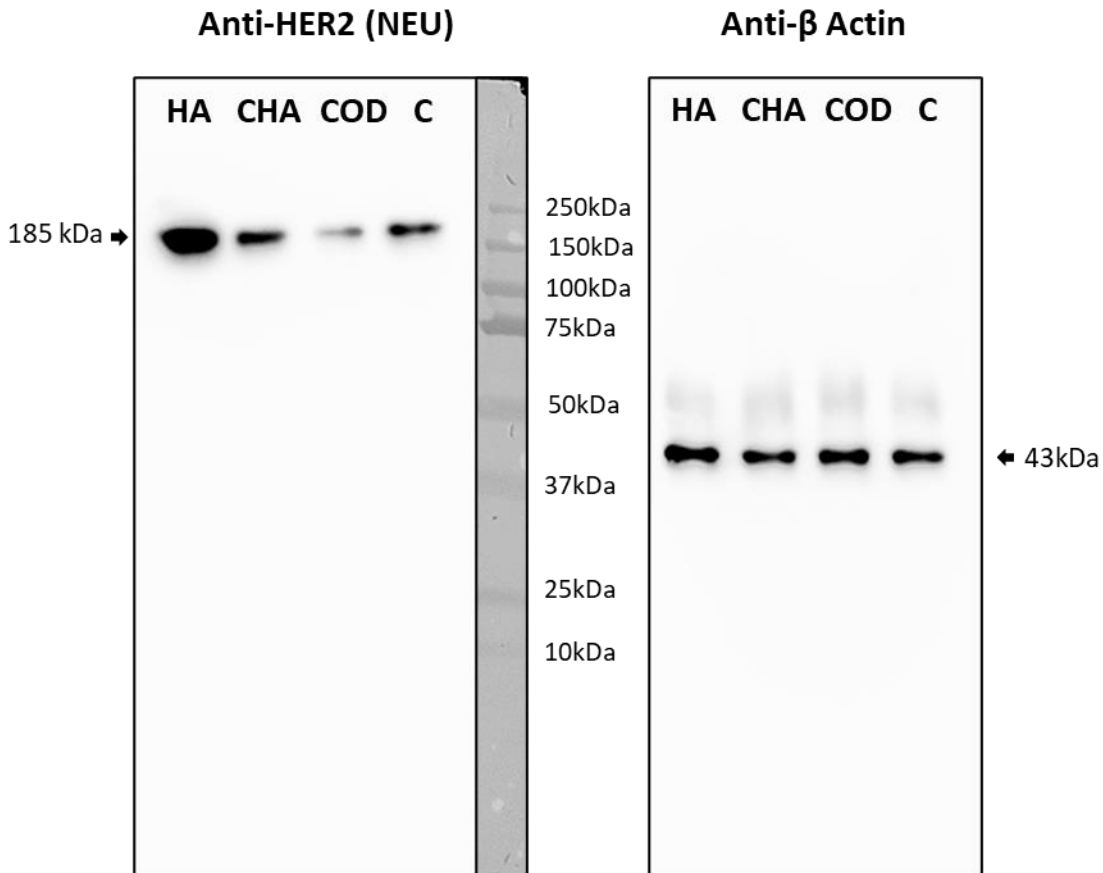

**Figure S2.** Western blot with anti Her2 and anti  $\beta$ -Actin antibodies. The four samples were loaded in two duplicates on the same gel. After the transfer, the membrane was cut into two halves. One half was incubated with anti – HER2 (NEU) diluted at 1:50, and the second half was incubated with anti –  $\beta$ -Actin diluted (1:400). HA=low carbonate apatite and CHA=high carbonate apatite.

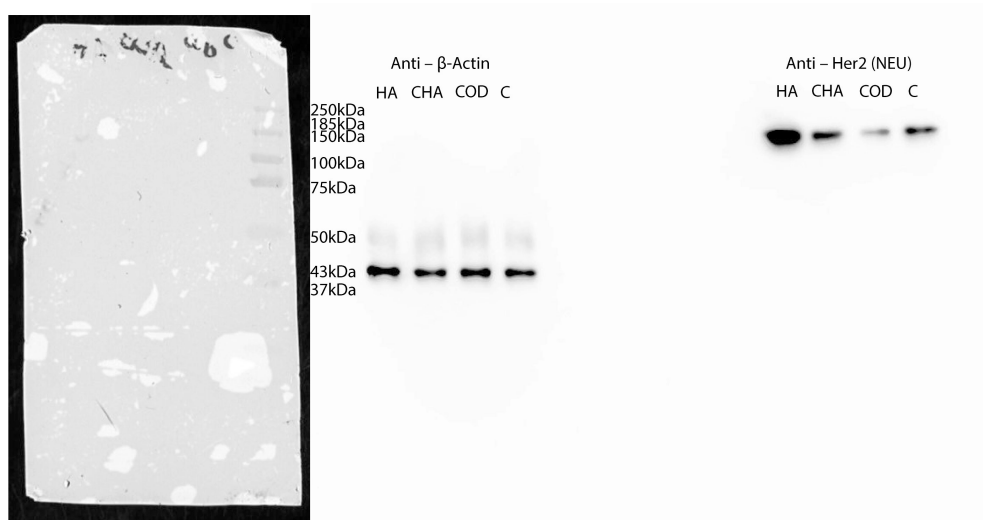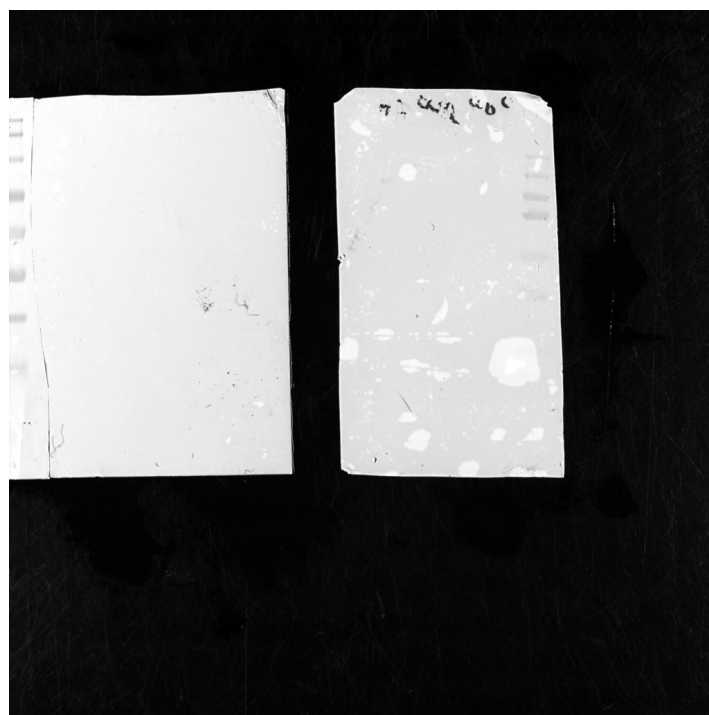

**Figure S3.** Raw Western blot data corresponding to Figure S2.
